# Supplementary material for: Preferences for achromatic horizontal, vertical, and square patterns in zebrafish (Danio rerio)
Source: PeerJ. 2017 Sep 4;5:e3748. doi: 10.7717/peerj.3748 (PMC5588788; doi:10.7717/peerj.3748)
Supplement: Supplemental Information 1 — Velocity (cm/s) of each individual fish within each zone during a single trial. [file peerj-05-3748-s001.xlsx]

## Sheet: 1 mm velocity
fish	X	Y	Z	group	object	velocity	block
1	1	1	0	2	1	5.9659	11
1	1	1	0	2	2	9.48663	11
1	1	1	0	2	3		11
2	1	1	0	2	1	8.2724	11
2	1	1	0	2	2	11.7389	11
2	1	1	0	2	3		11
3	1	1	0	2	1	7.24072	11
3	1	1	0	2	2	8.15497	11
3	1	1	0	2	3		11
4	1	1	0	2	1	6.22483	11
4	1	1	0	2	2	6.66245	11
4	1	1	0	2	3		11
5	1	1	0	2	1	8.20636	11
5	1	1	0	2	2	10.686	11
5	1	1	0	2	3		11
6	1	1	0	2	1	6.98917	11
6	1	1	0	2	2	5.26872	11
6	1	1	0	2	3		11
7	1	1	0	2	1	5.37089	11
7	1	1	0	2	2	5.85527	11
7	1	1	0	2	3		11
8	1	1	0	1	1	9.80638	11
8	1	1	0	1	2	10.5462	11
8	1	1	0	1	3		11
9	1	1	0	1	1	6.22041	11
9	1	1	0	1	2	7.06004	11
9	1	1	0	1	3		11
10	1	1	0	1	1	5.25605	11
10	1	1	0	1	2	5.91312	11
10	1	1	0	1	3		11
11	1	1	0	1	1	6.50929	11
11	1	1	0	1	2	9.35633	11
11	1	1	0	1	3		11
13	1	1	0	1	1	6.81262	11
13	1	1	0	1	2	6.57234	11
13	1	1	0	1	3		11
14	1	1	0	1	1	5.57647	11
14	1	1	0	1	2	9.40732	11
14	1	1	0	1	3		11
15	1	0	1	4	1	9.44474	101
15	1	0	1	4	2		101
15	1	0	1	4	3	8.46543	101
16	1	0	1	4	1	5.02989	101
16	1	0	1	4	2		101
16	1	0	1	4	3	5.58277	101
17	1	0	1	4	1	7.2075	101
17	1	0	1	4	2		101
17	1	0	1	4	3	7.07029	101
18	1	0	1	4	1	8.68015	101
18	1	0	1	4	2		101
18	1	0	1	4	3	8.82335	101
19	1	0	1	4	1	8.10583	101
19	1	0	1	4	2		101
19	1	0	1	4	3	8.93868	101
20	1	0	1	4	1	9.3756	101
20	1	0	1	4	2		101
20	1	0	1	4	3	8.53054	101
21	1	0	1	4	1	8.16275	101
21	1	0	1	4	2		101
21	1	0	1	4	3	7.54851	101
22	1	0	1	3	1	8.39441	101
22	1	0	1	3	2		101
22	1	0	1	3	3	8.09013	101
23	1	0	1	3	1	4.44231	101
23	1	0	1	3	2		101
23	1	0	1	3	3	6.35489	101
24	1	0	1	3	1	9.25263	101
24	1	0	1	3	2		101
24	1	0	1	3	3	13.4894	101
25	1	0	1	3	1	9.74636	101
25	1	0	1	3	2		101
25	1	0	1	3	3	8.81843	101
26	1	0	1	3	1	4.2492	101
26	1	0	1	3	2		101
26	1	0	1	3	3	5.76878	101
27	1	0	1	3	1	7.04149	101
27	1	0	1	3	2		101
27	1	0	1	3	3	6.69716	101
28	1	0	1	3	1	9.05017	101
28	1	0	1	3	2		101
28	1	0	1	3	3	11.6519	101
29	0	1	1	6	1		110
29	0	1	1	6	2	9.64957	110
29	0	1	1	6	3	12.6184	110
30	0	1	1	6	1		110
30	0	1	1	6	2	8.51901	110
30	0	1	1	6	3	11.472	110
31	0	1	1	6	1		110
31	0	1	1	6	2	10.4851	110
31	0	1	1	6	3	12.7812	110
32	0	1	1	6	1		110
32	0	1	1	6	2	7.67951	110
32	0	1	1	6	3	9.18738	110
34	0	1	1	6	1		110
34	0	1	1	6	2	10.0088	110
34	0	1	1	6	3	11.108	110
35	0	1	1	6	1		110
35	0	1	1	6	2	11.5186	110
35	0	1	1	6	3	15.4416	110
36	0	1	1	5	1		110
36	0	1	1	5	2	9.60042	110
36	0	1	1	5	3	5.27747	110
37	0	1	1	5	1		110
37	0	1	1	5	2	10.4268	110
37	0	1	1	5	3	7.76512	110
38	0	1	1	5	1		110
38	0	1	1	5	2	8.91114	110
38	0	1	1	5	3	8.67873	110
39	0	1	1	5	1		110
39	0	1	1	5	2	8.74271	110
39	0	1	1	5	3	7.16487	110
40	0	1	1	5	1		110
40	0	1	1	5	2	9.71346	110
40	0	1	1	5	3	10.3804	110
41	0	1	1	5	1		110
41	0	1	1	5	2	11.4165	110
41	0	1	1	5	3	10.8934	110
42	0	1	1	5	1		110
42	0	1	1	5	2	12.4181	110
42	0	1	1	5	3	9.58019	110
43	1	0	1	4	1	4.24314	101
43	1	0	1	4	2		101
43	1	0	1	4	3	7.90752	101
44	1	0	1	4	1	8.54599	101
44	1	0	1	4	2		101
44	1	0	1	4	3	10.8568	101
45	1	0	1	4	1	6.38999	101
45	1	0	1	4	2		101
45	1	0	1	4	3	5.70498	101
46	1	0	1	4	1	7.32708	101
46	1	0	1	4	2		101
46	1	0	1	4	3	7.92459	101
47	1	1	0	1	1	7.2302	11
47	1	1	0	1	2	7.27109	11
47	1	1	0	1	3		11
48	1	1	0	1	1	10.2647	11
48	1	1	0	1	2	9.91436	11
48	1	1	0	1	3		11
49	1	0	1	3	1	8.73308	101
49	1	0	1	3	2		101
49	1	0	1	3	3	10.4591	101
50	1	0	1	3	1	6.41761	101
50	1	0	1	3	2		101
50	1	0	1	3	3	5.15078	101
51	0	1	1	5	1		110
51	0	1	1	5	2	6.57883	110
51	0	1	1	5	3	6.53935	110
52	0	1	1	5	1		110
52	0	1	1	5	2	12.2623	110
52	0	1	1	5	3	10.1716	110
53	1	1	0	2	1	7.59925	11
53	1	1	0	2	2	10.2872	11
53	1	1	0	2	3		11
54	1	1	0	2	1	7.47661	11
54	1	1	0	2	2	9.49847	11
54	1	1	0	2	3		11
55	1	0	1	3	1	10.0476	101
55	1	0	1	3	2		101
55	1	0	1	3	3	12.4467	101
56	1	0	1	3	1	5.51206	101
56	1	0	1	3	2		101
56	1	0	1	3	3	8.49019	101
57	0	1	1	6	1		110
57	0	1	1	6	2	9.57625	110
57	0	1	1	6	3	10.6723	110
58	0	1	1	6	1		110
58	0	1	1	6	2	7.51206	110
58	0	1	1	6	3	7.0237	110
59	0	1	1	6	1		110
59	0	1	1	6	2	6.70835	110
59	0	1	1	6	3	8.84666	110
60	0	1	1	6	1		110
60	0	1	1	6	2	6.79082	110
60	0	1	1	6	3	9.00256	110
61	0	1	1	5	1		110
61	0	1	1	5	2	7.72694	110
61	0	1	1	5	3	8.34125	110
62	0	1	1	5	1		110
62	0	1	1	5	2	9.6648	110
62	0	1	1	5	3	10.29	110
64	1	1	0	1	1	10.4439	11
64	1	1	0	1	2	14.3649	11
64	1	1	0	1	3		11
65	1	1	0	2	1	10.2296	11
65	1	1	0	2	2	9.24701	11
65	1	1	0	2	3		11
66	1	1	0	2	1	7.31018	11
66	1	1	0	2	2	8.99058	11
66	1	1	0	2	3		11

## Sheet: 5 mm velocity
fish	X	Y	Z	group	object	velocity	block
1	1	1	0	2	1	9.19596	11
1	1	1	0	2	2	10.1906	11
1	1	1	0	2	3		11
2	1	1	0	1	1	7.69065	11
2	1	1	0	1	2	9.18423	11
2	1	1	0	1	3		11
3	1	1	0	2	1	9.99213	11
3	1	1	0	2	2	8.55024	11
3	1	1	0	2	3		11
4	1	1	0	1	1	8.42672	11
4	1	1	0	1	2	9.34469	11
4	1	1	0	1	3		11
5	1	1	0	1	1	11.6859	11
5	1	1	0	1	2	11.3106	11
5	1	1	0	1	3		11
6	1	1	0	2	1	8.38161	11
6	1	1	0	2	2	7.26225	11
6	1	1	0	2	3		11
7	1	1	0	2	1	7.14462	11
7	1	1	0	2	2	7.54736	11
7	1	1	0	2	3		11
8	1	1	0	2	1	8.23003	11
8	1	1	0	2	2	6.81824	11
8	1	1	0	2	3		11
9	1	1	0	1	1	8.08327	11
9	1	1	0	1	2	8.38649	11
9	1	1	0	1	3		11
10	1	1	0	1	1	6.6626	11
10	1	1	0	1	2	7.47727	11
10	1	1	0	1	3		11
11	0	1	1	6	1		110
11	0	1	1	6	2	9.14192	110
11	0	1	1	6	3	9.96156	110
12	0	1	1	5	1		110
12	0	1	1	5	2	8.65877	110
12	0	1	1	5	3	10.9362	110
13	0	1	1	5	1		110
13	0	1	1	5	2	5.51517	110
13	0	1	1	5	3	6.76713	110
14	0	1	1	5	1		110
14	0	1	1	5	2	7.47361	110
14	0	1	1	5	3	9.68376	110
15	0	1	1	5	1		110
15	0	1	1	5	2	6.49091	110
15	0	1	1	5	3	9.41616	110
16	0	1	1	5	1		110
16	0	1	1	5	2	7.41477	110
16	0	1	1	5	3	7.84442	110
17	0	1	1	6	1		110
17	0	1	1	6	2	9.57282	110
17	0	1	1	6	3	13.9699	110
18	0	1	1	6	1		110
18	0	1	1	6	2	9.27619	110
18	0	1	1	6	3	9.96799	110
19	0	1	1	6	1		110
19	0	1	1	6	2	7.86849	110
19	0	1	1	6	3	10.4786	110
20	0	1	1	6	1		110
20	0	1	1	6	2	8.40854	110
20	0	1	1	6	3	12.1772	110
21	1	0	1	4	1	7.45136	101
21	1	0	1	4	2		101
21	1	0	1	4	3	10.1177	101
22	1	0	1	4	1	6.03249	101
22	1	0	1	4	2		101
22	1	0	1	4	3	8.48604	101
23	1	0	1	4	1	4.85076	101
23	1	0	1	4	2		101
23	1	0	1	4	3	8.37444	101
24	1	0	1	3	1	6.01643	101
24	1	0	1	3	2		101
24	1	0	1	3	3	7.36318	101
25	1	0	1	3	1	7.43764	101
25	1	0	1	3	2		101
25	1	0	1	3	3	10.5334	101
26	1	0	1	3	1	8.10381	101
26	1	0	1	3	2		101
26	1	0	1	3	3	9.46404	101
27	1	0	1	4	1	9.02839	101
27	1	0	1	4	2		101
27	1	0	1	4	3	9.88581	101
28	1	0	1	4	1	5.86123	101
28	1	0	1	4	2		101
28	1	0	1	4	3	6.72844	101
29	1	0	1	4	1	6.31486	101
29	1	0	1	4	2		101
29	1	0	1	4	3	7.40539	101
30	1	0	1	3	1	7.55192	101
30	1	0	1	3	2		101
30	1	0	1	3	3	8.73845	101
31	1	0	1	3	1	5.4453	101
31	1	0	1	3	2		101
31	1	0	1	3	3	6.24634	101
32	1	0	1	3	1	7.23278	101
32	1	0	1	3	2		101
32	1	0	1	3	3	7.41553	101
33	1	1	0	2	1	9.04335	11
33	1	1	0	2	2	9.84778	11
33	1	1	0	2	3		11
34	1	1	0	2	1	9.22845	11
34	1	1	0	2	2	10.374	11
34	1	1	0	2	3		11
35	1	1	0	1	1	6.78006	11
35	1	1	0	1	2	7.16455	11
35	1	1	0	1	3		11
36	1	1	0	1	1	9.04759	11
36	1	1	0	1	2	8.713	11
36	1	1	0	1	3		11
37	0	1	1	6	1		110
37	0	1	1	6	2	8.5317	110
37	0	1	1	6	3	9.70118	110
38	0	1	1	6	1		110
38	0	1	1	6	2	7.66985	110
38	0	1	1	6	3	18.4274	110
39	1	0	1	3	1	7.97265	101
39	1	0	1	3	2		101
39	1	0	1	3	3	9.68453	101
40	1	0	1	4	1	7.32549	101
40	1	0	1	4	2		101
40	1	0	1	4	3	8.14603	101
41	0	1	1	5	1		110
41	0	1	1	5	2	6.64391	110
41	0	1	1	5	3	7.81745	110
42	0	1	1	5	1		110
42	0	1	1	5	2	9.82519	110
42	0	1	1	5	3	9.41512	110
43	1	1	0	1	1	8.43433	11
43	1	1	0	1	2	8.6449	11
43	1	1	0	1	3		11
44	1	1	0	1	1	7.54634	11
44	1	1	0	1	2	8.44641	11
44	1	1	0	1	3		11
45	0	1	1	5	1		110
45	0	1	1	5	2	9.09207	110
45	0	1	1	5	3	9.91244	110
46	0	1	1	5	1		110
46	0	1	1	5	2	7.81101	110
46	0	1	1	5	3	8.46737	110
47	0	1	1	5	1		110
47	0	1	1	5	2	5.23896	110
47	0	1	1	5	3	6.24786	110
48	1	1	0	2	1	10.1013	11
48	1	1	0	2	2	12.0973	11
48	1	1	0	2	3		11
49	1	0	1	3	1	8.18846	101
49	1	0	1	3	2		101
49	1	0	1	3	3	11.1362	101
50	1	0	1	3	1	10.2191	101
50	1	0	1	3	2		101
50	1	0	1	3	3	14.5379	101
51	0	1	1	6	1		110
51	0	1	1	6	2	4.82151	110
51	0	1	1	6	3	9.71762	110
53	0	1	1	6	1		110
53	0	1	1	6	2	8.44568	110
53	0	1	1	6	3	8.73896	110
54	0	1	1	6	1		110
54	0	1	1	6	2	9.69821	110
54	0	1	1	6	3	9.17036	110
55	1	1	0	2	1	6.1206	11
55	1	1	0	2	2	6.84104	11
55	1	1	0	2	3		11
56	1	0	1	4	1	9.24215	101
56	1	0	1	4	2		101
56	1	0	1	4	3	11.1348	101
57	1	0	1	4	1	8.36194	101
57	1	0	1	4	2		101
57	1	0	1	4	3	15.3368	101
58	1	0	1	3	1	5.70169	101
58	1	0	1	3	2		101
58	1	0	1	3	3	9.5336	101
59	1	0	1	3	1	6.92196	101
59	1	0	1	3	2		101
59	1	0	1	3	3	9.3797	101
60	1	0	1	4	1	9.39467	101
60	1	0	1	4	2		101
60	1	0	1	4	3	12.6625	101
61	1	0	1	4	1	9.42722	101
61	1	0	1	4	2		101
61	1	0	1	4	3	9.32087	101
62	1	1	0	2	1	11.4751	11
62	1	1	0	2	2	9.92322	11
62	1	1	0	2	3		11
64	1	1	0	1	1	6.64387	11
64	1	1	0	1	2	8.76388	11
64	1	1	0	1	3		11
65	1	1	0	1	1	11.5051	11
65	1	1	0	1	2	11.5678	11
65	1	1	0	1	3		11
66	0	1	1	5	1		110
66	0	1	1	5	2	8.22131	110
66	0	1	1	5	3	8.76056	110

## Sheet: 10 mm velocity
fish	X	Y	Z	group	object	velocity	block
1	1	1	0	2	1	8.04461	11
1	1	1	0	2	2	9.1961	11
1	1	1	0	2	3		11
2	1	1	0	2	1	10.3476	11
2	1	1	0	2	2	10.235	11
2	1	1	0	2	3		11
3	1	1	0	2	1	8.07099	11
3	1	1	0	2	2	7.6593	11
3	1	1	0	2	3		11
4	1	1	0	2	1	6.52084	11
4	1	1	0	2	2	7.89211	11
4	1	1	0	2	3		11
6	1	1	0	2	1	6.0836	11
6	1	1	0	2	2	6.96564	11
6	1	1	0	2	3		11
7	1	1	0	1	1	10.7464	11
7	1	1	0	1	2	10.6075	11
7	1	1	0	1	3		11
8	1	1	0	1	1	9.27671	11
8	1	1	0	1	2	9.211	11
8	1	1	0	1	3		11
9	1	1	0	1	1	7.64533	11
9	1	1	0	1	2	7.78978	11
9	1	1	0	1	3		11
10	1	1	0	1	1	6.93049	11
10	1	1	0	1	2	6.93435	11
10	1	1	0	1	3		11
11	1	1	0	1	1	6.15273	11
11	1	1	0	1	2	10.7872	11
11	1	1	0	1	3		11
12	1	1	0	2	1	20.3346	11
12	1	1	0	2	2	4.43668	11
12	1	1	0	2	3		11
14	1	1	0	1	1	8.63488	11
14	1	1	0	1	2	14.0492	11
14	1	1	0	1	3		11
15	1	1	0	1	1	12.7454	11
15	1	1	0	1	2	14.051	11
15	1	1	0	1	3		11
16	1	1	0	1	1	7.58904	11
16	1	1	0	1	2	5.48588	11
16	1	1	0	1	3		11
17	1	1	0	2	1	11.32	11
17	1	1	0	2	2	12.066	11
17	1	1	0	2	3		11
18	1	1	0	2	1	6.67387	11
18	1	1	0	2	2	6.20775	11
18	1	1	0	2	3		11
19	1	1	0	1	1	42.0199	11
19	1	1	0	1	2	59.3421	11
19	1	1	0	1	3		11
20	1	1	0	1	1	10.5073	11
20	1	1	0	1	2	20.024	11
20	1	1	0	1	3		11
21	1	1	0	2	1	6.79934	11
21	1	1	0	2	2	6.18114	11
21	1	1	0	2	3		11
22	1	1	0	2	1	10.5961	11
22	1	1	0	2	2	7.42454	11
22	1	1	0	2	3		11
24	1	1	0	2	1	9.03472	11
24	1	1	0	2	2	4.32189	11
24	1	1	0	2	3		11
25	1	0	1	4	1	7.35942	101
25	1	0	1	4	2		101
25	1	0	1	4	3	7.30978	101
26	1	0	1	4	1	8.04721	101
26	1	0	1	4	2		101
26	1	0	1	4	3	9.50548	101
27	1	0	1	4	1	11.4147	101
27	1	0	1	4	2		101
27	1	0	1	4	3	9.49641	101
28	1	0	1	4	1	8.27837	101
28	1	0	1	4	2		101
28	1	0	1	4	3	8.08935	101
29	1	0	1	3	1	11.6168	101
29	1	0	1	3	2		101
29	1	0	1	3	3	8.94325	101
30	1	0	1	3	1	15.1266	101
30	1	0	1	3	2		101
30	1	0	1	3	3	11.1087	101
31	1	0	1	4	1	11.0869	101
31	1	0	1	4	2		101
31	1	0	1	4	3	16.1104	101
32	1	0	1	4	1	10.3668	101
32	1	0	1	4	2		101
32	1	0	1	4	3	13.7905	101
33	1	0	1	3	1	5.87875	101
33	1	0	1	3	2		101
33	1	0	1	3	3	4.33967	101
34	1	0	1	3	1	12.4259	101
34	1	0	1	3	2		101
34	1	0	1	3	3	11.022	101
35	1	0	1	3	1	6.07773	101
35	1	0	1	3	2		101
35	1	0	1	3	3	7.88983	101
36	1	0	1	3	1	17.5091	101
36	1	0	1	3	2		101
36	1	0	1	3	3	12.483	101
38	1	0	1	4	1	6.36288	101
38	1	0	1	4	2		101
38	1	0	1	4	3	9.87623	101
39	1	0	1	4	1	11.5688	101
39	1	0	1	4	2		101
39	1	0	1	4	3	14.0753	101
40	1	0	1	4	1	12.4374	101
40	1	0	1	4	2		101
40	1	0	1	4	3	12.9794	101
41	1	0	1	4	1	2.61771	101
41	1	0	1	4	2		101
41	1	0	1	4	3	2.31443	101
42	1	0	1	4	1	5.23869	101
42	1	0	1	4	2		101
42	1	0	1	4	3	5.81596	101
43	1	0	1	4	1	6.16036	101
43	1	0	1	4	2		101
43	1	0	1	4	3	6.72863	101
44	1	0	1	3	1	11.3195	101
44	1	0	1	3	2		101
44	1	0	1	3	3	10.7923	101
45	1	0	1	3	1	8.53974	101
45	1	0	1	3	2		101
45	1	0	1	3	3	8.35235	101
46	1	0	1	3	1	12.4425	101
46	1	0	1	3	2		101
46	1	0	1	3	3	12.5438	101
47	0	1	1	5	1		110
47	0	1	1	5	2	5.55649	110
47	0	1	1	5	3	9.65361	110
48	0	1	1	5	1		110
48	0	1	1	5	2	9.57292	110
48	0	1	1	5	3	8.15478	110
49	0	1	1	6	1		110
49	0	1	1	6	2	10.6332	110
49	0	1	1	6	3	11.0313	110
50	0	1	1	6	1		110
50	0	1	1	6	2	24.0671	110
50	0	1	1	6	3	10.8073	110
51	0	1	1	6	1		110
51	0	1	1	6	2	9.71692	110
51	0	1	1	6	3	11.6688	110
52	0	1	1	6	1		110
52	0	1	1	6	2	9.62077	110
52	0	1	1	6	3	9.13775	110
53	0	1	1	5	1		110
53	0	1	1	5	2	9.69421	110
53	0	1	1	5	3	7.118	110
54	0	1	1	5	1		110
54	0	1	1	5	2	8.89074	110
54	0	1	1	5	3	10.304	110
55	0	1	1	5	1		110
55	0	1	1	5	2	9.30582	110
55	0	1	1	5	3	10.4114	110
56	0	1	1	5	1		110
56	0	1	1	5	2	5.34199	110
56	0	1	1	5	3	9.92096	110
57	0	1	1	5	1		110
57	0	1	1	5	2	6.52012	110
57	0	1	1	5	3	4.07638	110
58	0	1	1	5	1		110
58	0	1	1	5	2	6.20162	110
58	0	1	1	5	3	6.58016	110
59	0	1	1	6	1		110
59	0	1	1	6	2	8.73616	110
59	0	1	1	6	3	11.0827	110
60	0	1	1	6	1		110
60	0	1	1	6	2	8.33098	110
60	0	1	1	6	3	8.46273	110
61	0	1	1	6	1		110
61	0	1	1	6	2	5.28902	110
61	0	1	1	6	3	5.21072	110
62	0	1	1	6	1		110
62	0	1	1	6	2	11.8751	110
62	0	1	1	6	3	11.2007	110
63	0	1	1	6	1		110
63	0	1	1	6	2	10.9087	110
63	0	1	1	6	3	10.5106	110
64	0	1	1	6	1		110
64	0	1	1	6	2	8.14568	110
64	0	1	1	6	3	7.04111	110
65	0	1	1	6	1		110
65	0	1	1	6	2	4.87702	110
65	0	1	1	6	3	5.26751	110
66	0	1	1	5	1		110
66	0	1	1	5	2	8.9456	110
66	0	1	1	5	3	12.4474	110
